# Supplementary material for: Crystal growth control of rod-shaped ε-Fe2O3 nanocrystals
Source: Royal Society of Chemistry journal article supplement (doi:10.1039/d0ra07256g), 2020-01-01
Supplement: d0ra07256g1.pdf [file d0ra07256g1.pdf]

## Electronic Supplementary Information

# Crystal growth control of rod-shaped $\epsilon$ -Fe<sub>2</sub>O<sub>3</sub> nanocrystals

Hiroko Tokoro,<sup>1,2,\*</sup> Junpei Fukui,<sup>1</sup> Koki Watanabe,<sup>1</sup> Marie Yoshikiyo,<sup>2</sup> Asuka Namai,<sup>2</sup>  
and Shin-ichi Ohkoshi<sup>2,\*</sup>

<sup>1</sup> Department of Materials Science, Faculty of Pure and Applied Sciences, University of Tsukuba,  
1-1-1 Tennodai, Tsukuba, Ibaraki 305-8573, Japan

<sup>2</sup> Department of Chemistry, School of Science, The University of Tokyo, 7-3-1 Hongo, Bunkyo-ku,  
Tokyo 113-0033, Japan

e-mail: tokoro@ims.tsukuba.ac.jp, ohkoshi@chem.s.u-tokyo.ac.jp

| Contents                                                                                                                     |                          | Page      |
|------------------------------------------------------------------------------------------------------------------------------|--------------------------|-----------|
| §1. Crystal structure analyses. ....                                                                                         | <b>Fig. S1</b>           | S2        |
|                                                                                                                              | <b>Table S1</b>          | S2        |
|                                                                                                                              | <b>Fig. S2</b>           | S3        |
| §2. Particle sizes. ....                                                                                                     | <b>Fig. S3, Table S2</b> | S4,S5     |
| §3. Magnetic hysteresis loops <b>at room temperature</b> . ....                                                              | <b>Fig. S4</b>           | S6        |
| <b>§4. Raman spectra</b> . ....                                                                                              | <b>Fig. S5</b>           | <b>S7</b> |
| §5. Rectangular-type rod-shaped $\epsilon$ -Fe <sub>2</sub> O <sub>3</sub> crystal and its crystallographic direction.       |                          |           |
|                                                                                                                              | <b>Fig. S6</b>           | S8        |
| §6. Surface energy in $\epsilon$ -Fe <sub>2</sub> O <sub>3</sub> . ....                                                      | <b>Table S3</b>          | S9        |
| §7. Schematic of the lattice planes, values of surface energy,<br>and number of FeO <sub>6</sub> -broken bond per area. .... | <b>Fig. S7</b>           | S10       |

## §1. Crystal structure analyses.

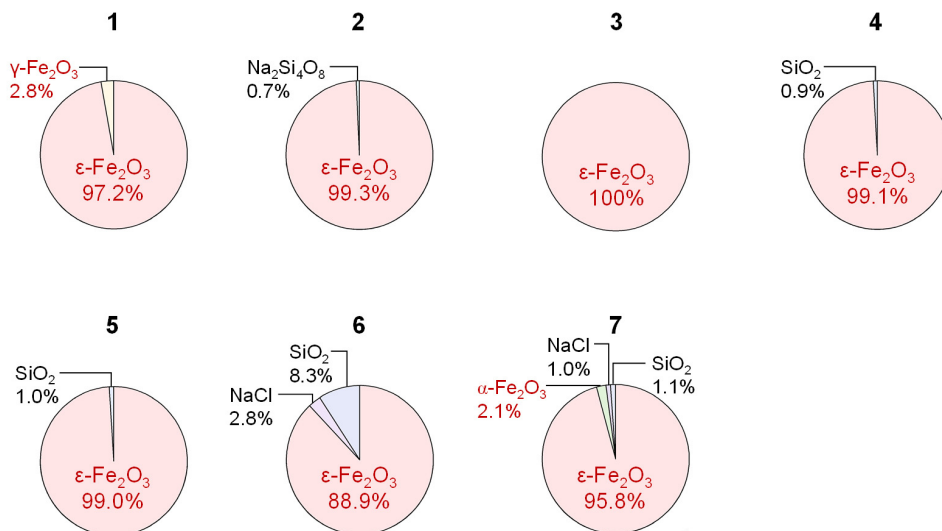

**Fig. S1.** Phase fractions obtained by Rietveld analyses for samples 1–7.

**Table S1.** Lattice parameters of  $\epsilon$ - $\text{Fe}_2\text{O}_3$  in 1–7 and refinement parameters obtained by Rietveld analyses of the XRPD patterns.

| Sample | Orthorhombic : $Pna 2_1$ |            |            | Refinement parameters |              |      |
|--------|--------------------------|------------|------------|-----------------------|--------------|------|
|        | Lattice parameters       |            |            | Crystal size<br>(nm)  | $R_{wp}$ (%) | $S$  |
|        | $a$ (Å)                  | $b$ (Å)    | $c$ (Å)    |                       |              |      |
| 1      | 5.064(8)                 | 8.729(14)  | 9.610(9)   | 4.4                   | 0.77         | 1.30 |
| 2      | 5.087(2)                 | 8.787(3)   | 9.489(3)   | 5.9                   | 0.71         | 1.17 |
| 3      | 5.0906(12)               | 8.7777(19) | 9.4924(15) | 5.5                   | 0.75         | 1.29 |
| 4      | 5.0864(4)                | 8.7856(8)  | 9.4741(5)  | 9.8                   | 0.62         | 1.21 |
| 5      | 5.0895(5)                | 8.7860(10) | 9.4705(9)  | 15.2                  | 0.74         | 1.29 |
| 6      | 5.0896(5)                | 8.7873(9)  | 9.4714(9)  | 16.8                  | 0.88         | 1.65 |
| 7      | 5.0927(3)                | 8.7859(5)  | 9.4732(5)  | 26.6                  | 1.17         | 1.99 |

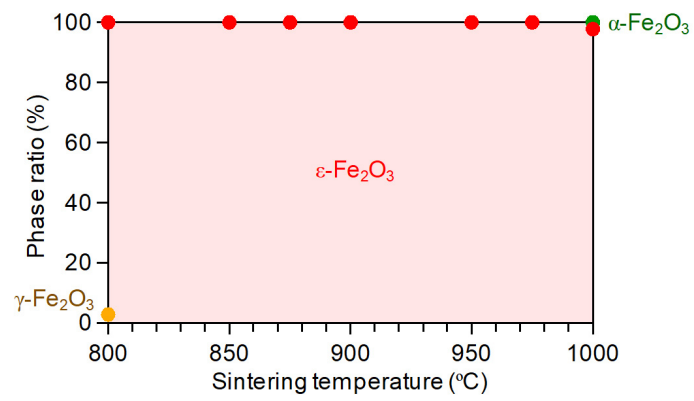

**Fig. S2.** Phase diagram of the phase ratio versus the sintering temperature for iron oxides.

## §2. Particle sizes.

**Table S2.** Particle size of 1–7 obtained by the TEM images.

| Sample | Particle size for long axis | Particle size for short axis | Aspect ratio                         |
|--------|-----------------------------|------------------------------|--------------------------------------|
|        | $d_{\text{long}}$ (nm)      | $d_{\text{short}}$ (nm)      | $d_{\text{long}} / d_{\text{short}}$ |
| 1      | $11.9 \pm 3.5$              | $8.4 \pm 1.9$                | 1.4                                  |
| 2      | $22.2 \pm 8.1$              | $12.5 \pm 3.2$               | 1.8                                  |
| 3      | $23.0 \pm 9.3$              | $12.3 \pm 4.1$               | 1.9                                  |
| 4      | $31.7 \pm 13.0$             | $15.8 \pm 4.7$               | 2.0                                  |
| 5      | $50.0 \pm 25.2$             | $21.3 \pm 5.9$               | 2.3                                  |
| 6      | $70.1 \pm 44.0$             | $24.0 \pm 7.6$               | 2.9                                  |
| 7      | $93.2 \pm 105$              | $28.2 \pm 12.2$              | 3.3                                  |

The values of the errors are the standard deviation.

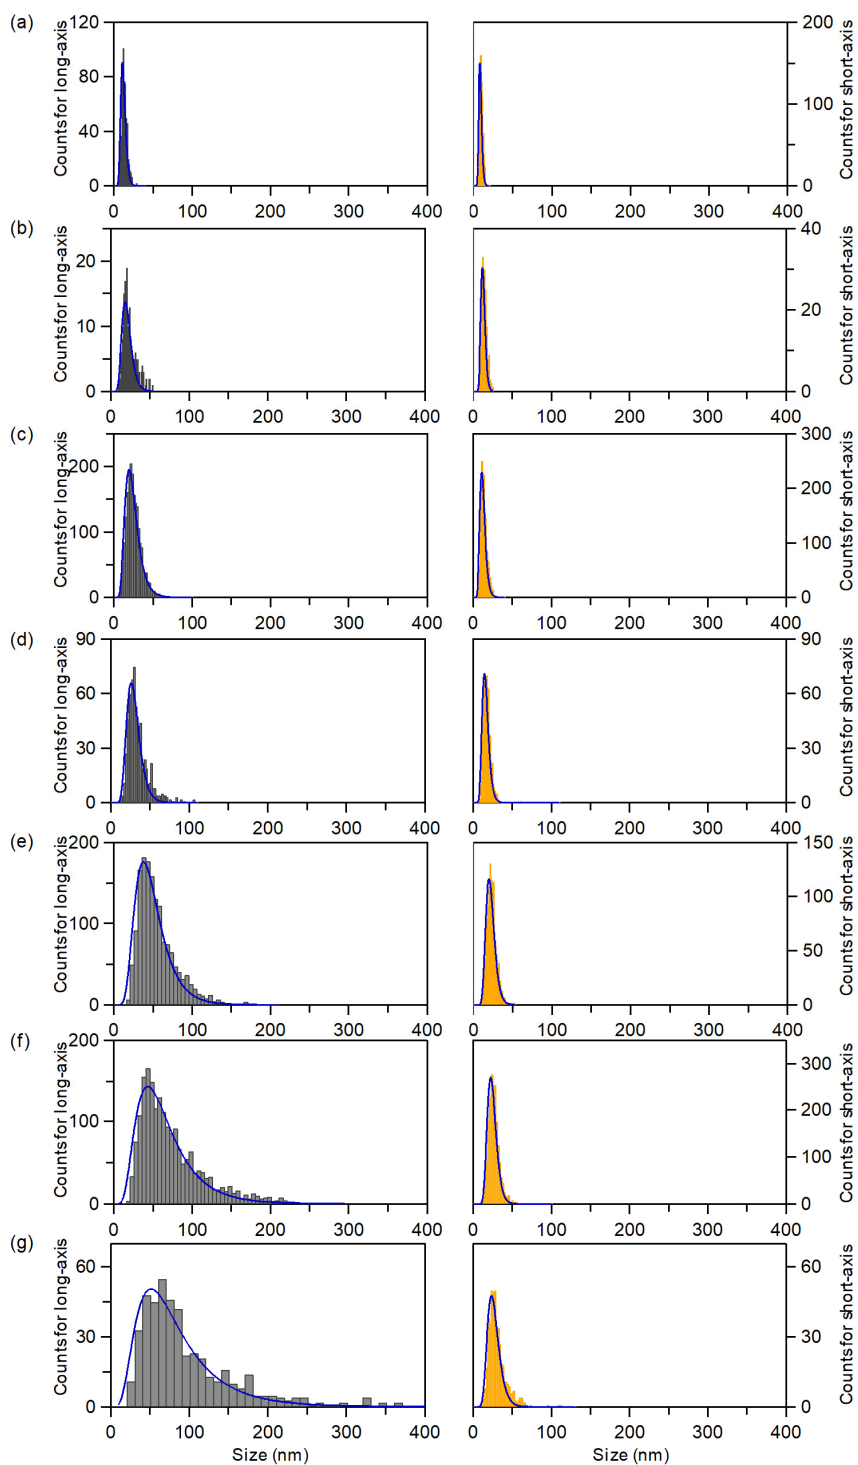

**Fig. S3.** Particle size distributions of the long-axis (gray) and the short-axis (orange) for **1** (a), **2** (b), **3** (c), **4** (d), **5** (e), **6** (f), and **7** (g). Blue lines are the fitted curve by the log-normal distribution function.

### §3. Magnetic hysteresis loops at room temperature.

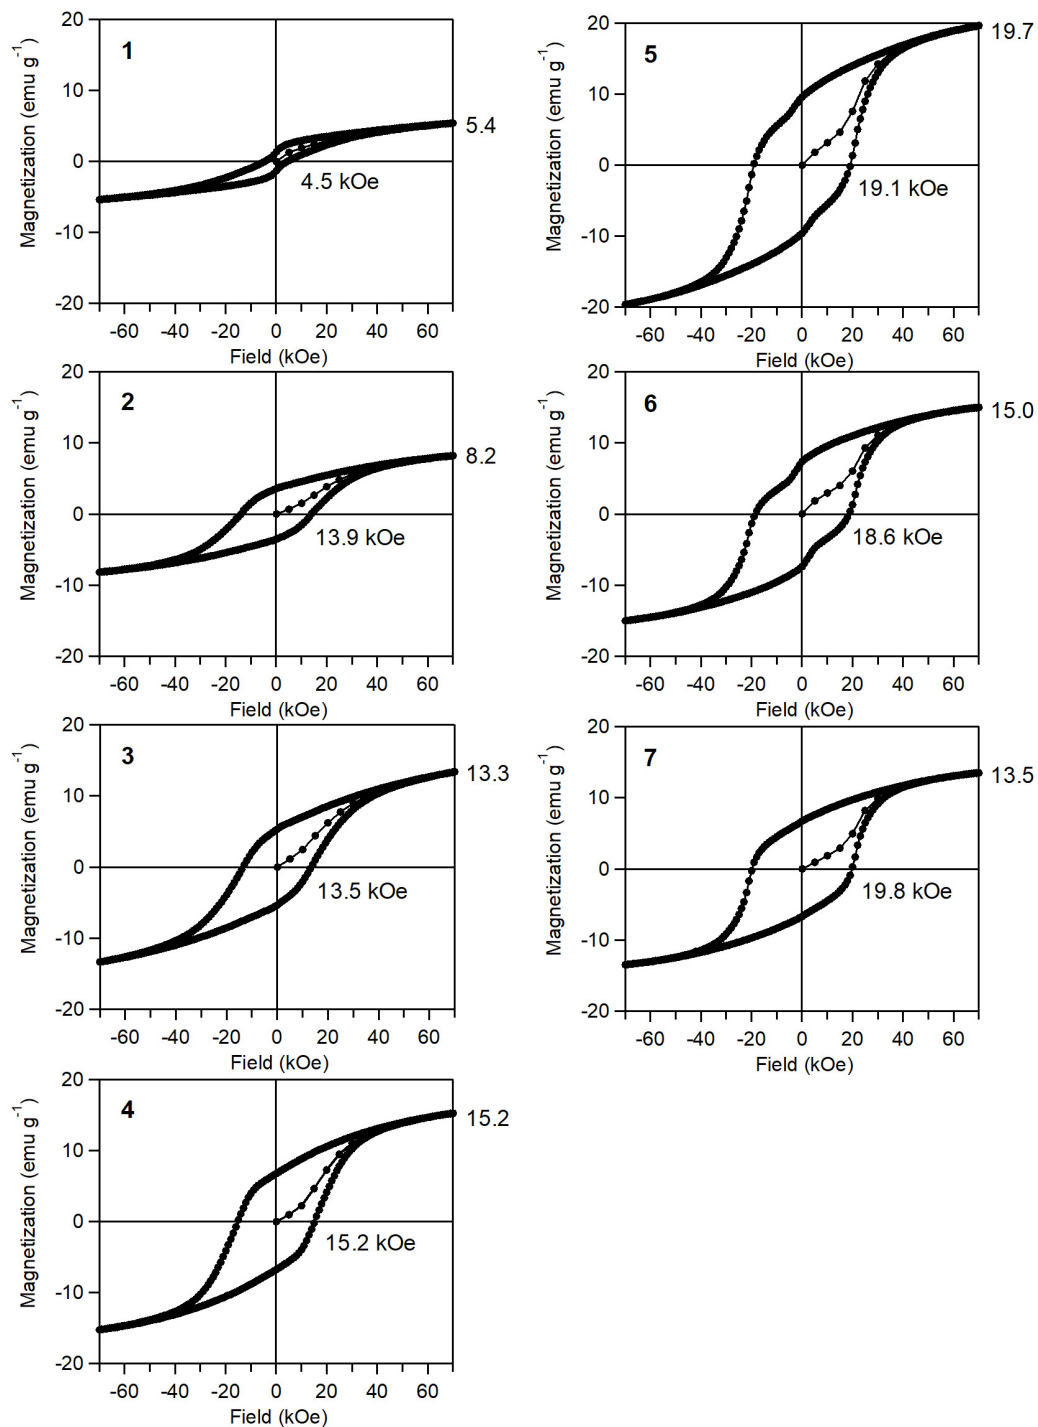

Fig. S4. Magnetic hysteresis loops measured at room temperature up to 7 Tesla for 1–7.

#### §4. Raman spectra.

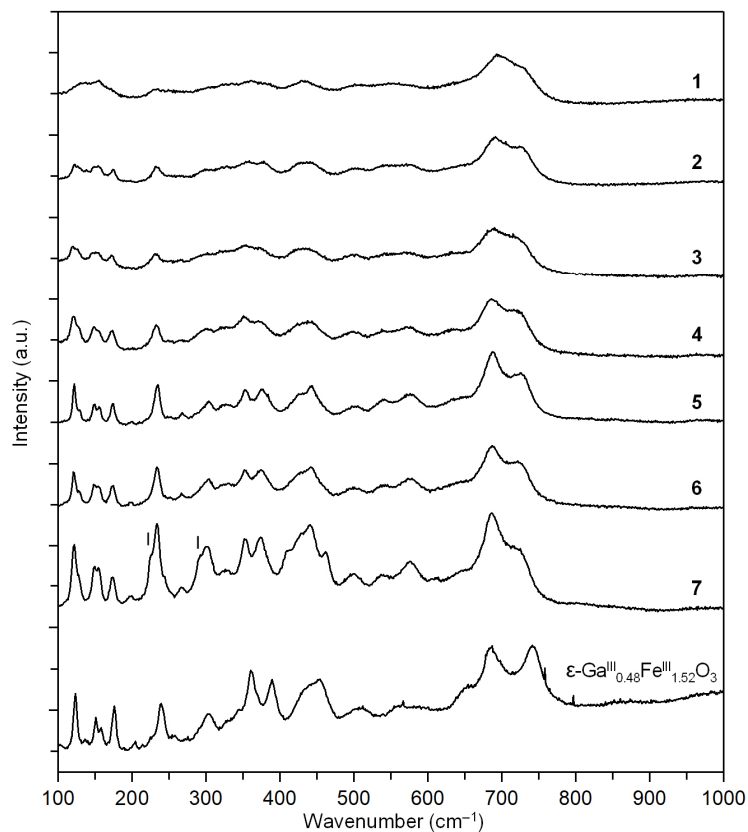

**Fig. S5.** Raman spectra measured at room temperature for 1–7. Black lines indicate the reported peak positions of  $\alpha$ -Fe<sub>2</sub>O<sub>3</sub>.<sup>38</sup> Bottom spectrum is a reference of  $\epsilon$ -Ga<sup>III</sup><sub>0.48</sub>Fe<sup>III</sup><sub>1.52</sub>O<sub>3</sub>, which was previously reported.<sup>S1</sup> Spectra of 1–7 do not show any peaks attributed to the divalent iron. (i.e., Raman spectra of 1–7 indicate iron is in the trivalent state).

<sup>S1</sup> S. Ohkoshi, M. Yoshikiyo, Y. Umeta, M. Komine, R. Fujiwara, H. Tokoro, K. Chiba, T. Soejima, A. Namai, Y. Miyamoto, T. Nasu, Phonon mode calculation, Far- and Mid-infrared, and Raman spectra of  $\epsilon$ -Ga<sub>0.5</sub>Fe<sub>1.5</sub>O<sub>3</sub>, *J. Phys. Chem. C*, 2017, **121**, 5812–5819.

§5. Rectangular-type rod-shaped  $\epsilon$ -Fe<sub>2</sub>O<sub>3</sub> nanocrystal and its crystallographic direction.

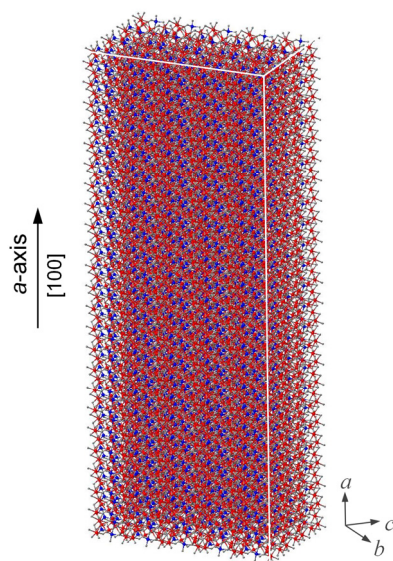

**Fig. S6.** Schematic of a rectangular-type rod-shaped  $\epsilon$ -Fe<sub>2</sub>O<sub>3</sub> nanocrystal and its crystallographic direction. Red, blue, and gray spheres indicate Fe at octahedral sites, Fe at tetrahedral sites, and O, respectively.



## §6. Surface energy in $\epsilon$ -Fe<sub>2</sub>O<sub>3</sub>.

**Table S3.** Surface energy and the ratio of the coordination bonds to the broken bonds in  $\epsilon$ -Fe<sub>2</sub>O<sub>3</sub>.

| Lattice plane | Surface energy $\alpha_{hkl}$ (nm <sup>-2</sup> )* | $N_{hkl}$                                                            |
|---------------|----------------------------------------------------|----------------------------------------------------------------------|
|               |                                                    | Number of FeO <sub>6</sub> -broken bond per area (nm <sup>-2</sup> ) |
| (1 0 0)       | 19.2                                               | 14.4                                                                 |
| (0 1 0)       | 18.7                                               | 16.6                                                                 |
| (0 0 1)       | 13.4                                               | 8.9                                                                  |
| (1 1 0)       | 19.0                                               | 15.2                                                                 |
| (0 1 1)       | 11.9                                               | 7.1                                                                  |
| (1 0 1)       | 19.7                                               | 15.1                                                                 |
| (1 1 1)       | 17.8                                               | 13.4                                                                 |

\*Relative surface energy, number of broken bonds per area assuming that the Fe and O sites have equal binding energies.

**§7. Schematic of the lattice planes, values of surface energy, and number of FeO<sub>6</sub>-broken bond per area.**

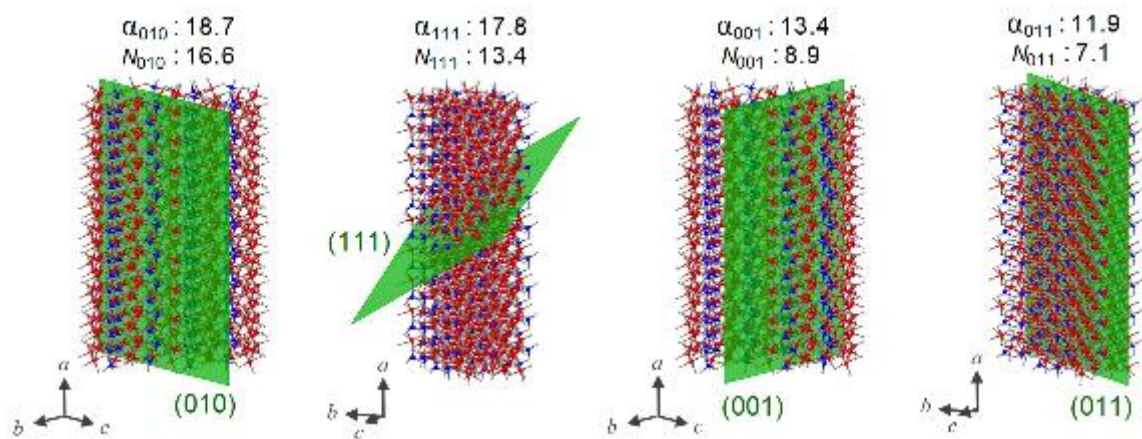

**Fig. S7.** Schematic of the lattice planes (green plane), values of surface energy ( $\alpha_{hkl}$ , nm<sup>-2</sup>), and number of FeO<sub>6</sub>-broken bond per area ( $N_{hkl}$ , nm<sup>-2</sup>) for the rod-shaped  $\epsilon$ -Fe<sub>2</sub>O<sub>3</sub> nanocrystals. Red, blue, and gray spheres in the crystal structure indicate the Fe at octahedral site, Fe at tetrahedral site, and O, respectively.
